# Supplementary material for: Synthesis, properties and photo-responsive behavior of luminescent side chain polymers containing D–π-A α-cyanostilbene units
Source: Royal Society of Chemistry journal article supplement (doi:10.1039/c9py00339h), 2019-01-01
Supplement: c9py00339h1.pdf [file c9py00339h1.pdf]

## Electronic supplementary information

### Synthesis, Properties and Photo-responsive Behavior of Luminescent Side Chain Polymers Containing D- $\pi$ -A $\alpha$ -Cyanostilbene Units

Yongjie Yuan, Lifang He, Jindi Li, Hailiang Zhang\*

Key Laboratory of Polymeric Materials and Application Technology of Hunan Province, Key Laboratory of Advanced Functional Polymer Materials of Colleges and Universities of Hunan Province, College of Chemistry, Xiangtan University, Xiangtan 411105, Hunan Province, China.

E-mail: hailiangzhang@xtu.edu.cn

#### Chemical structures of monomers and polymers

M8PVPCN:  $^1\text{H}$  NMR ( $\delta$ , ppm,  $\text{CDCl}_3$ ): 7.92-7.96 (d, 2H, Ph-H); 7.72-7.74 (d, 2H, Ph-H); 7.61-7.63 (d, 2H, Ph-H); 7.41 (s, 1H, -CH=); 6.95-6.97 (d, 2H, Ph-H); 6.10 (s, 1H, =CH<sub>2</sub>); 5.55 (s, 1H, =CH<sub>2</sub>); 4.13-4.16 (m, 2H, -OCH<sub>2</sub>-); 3.99-4.02 (m, 2H, -OCH<sub>2</sub>-); 1.95 (s, 3H, -CH<sub>3</sub>); 1.77-1.73 (m, 2H, -CH<sub>2</sub>-); 1.65-1.70 (m, 2H, -CH<sub>2</sub>-); 1.38-1.57 (m, 8H, -CH<sub>2</sub>-). Mass Spectrometry (MS) (m/z) [M] Calcd for C<sub>28</sub>H<sub>30</sub>BrN<sub>2</sub>O<sub>3</sub>, 442.23; found 442.13.

M4PVPCN:  $^1\text{H}$  NMR ( $\delta$ , ppm,  $\text{CDCl}_3$ ): 7.93-7.95 (d, 2H, Ph-H); 7.73-7.75 (d, 2H, Ph-H); 7.61-7.64 (d, 2H, Ph-H); 7.41 (s, 1H, -CH=); 6.95-6.98 (d, 2H, Ph-H); 6.11 (s, 1H, =CH<sub>2</sub>); 5.56 (s, 1H, =CH<sub>2</sub>); 4.22-4.25 (m, 2H, -OCH<sub>2</sub>-); 4.05-4.08 (m, 2H, -OCH<sub>2</sub>-); 1.88-1.96 (m, 5H, -CH<sub>3</sub> and -CH<sub>2</sub>-); 1.55-1.57 (m, 2H, -CH<sub>2</sub>-). Mass Spectrometry (MS) (m/z) [M] Calcd for C<sub>24</sub>H<sub>24</sub>BrN<sub>2</sub>O<sub>3</sub>, 386.16; found 386.29.

M2PVPCN:  $^1\text{H}$  NMR ( $\delta$ , ppm,  $\text{CDCl}_3$ ): 7.93-7.95 (d, 2H, Ph-H); 7.73-7.75 (d, 2H, Ph-H); 7.63-7.63 (d, 2H, Ph-H); 7.42 (s, 1H, -CH=); 6.97-7.01 (d, 2H, Ph-H); 6.15 (s, 1H, =CH<sub>2</sub>); 5.61 (s, 1H, =CH<sub>2</sub>); 4.51-4.54 (m, 2H, -OCH<sub>2</sub>-); 4.27-4.30 (m, 2H, -OCH<sub>2</sub>-); 1.96 (s, 3H, -CH<sub>3</sub>). Mass Spectrometry (MS) (m/z) [M] Calcd for C<sub>22</sub>H<sub>21</sub>BrN<sub>2</sub>O, 358.13; found 358.41.

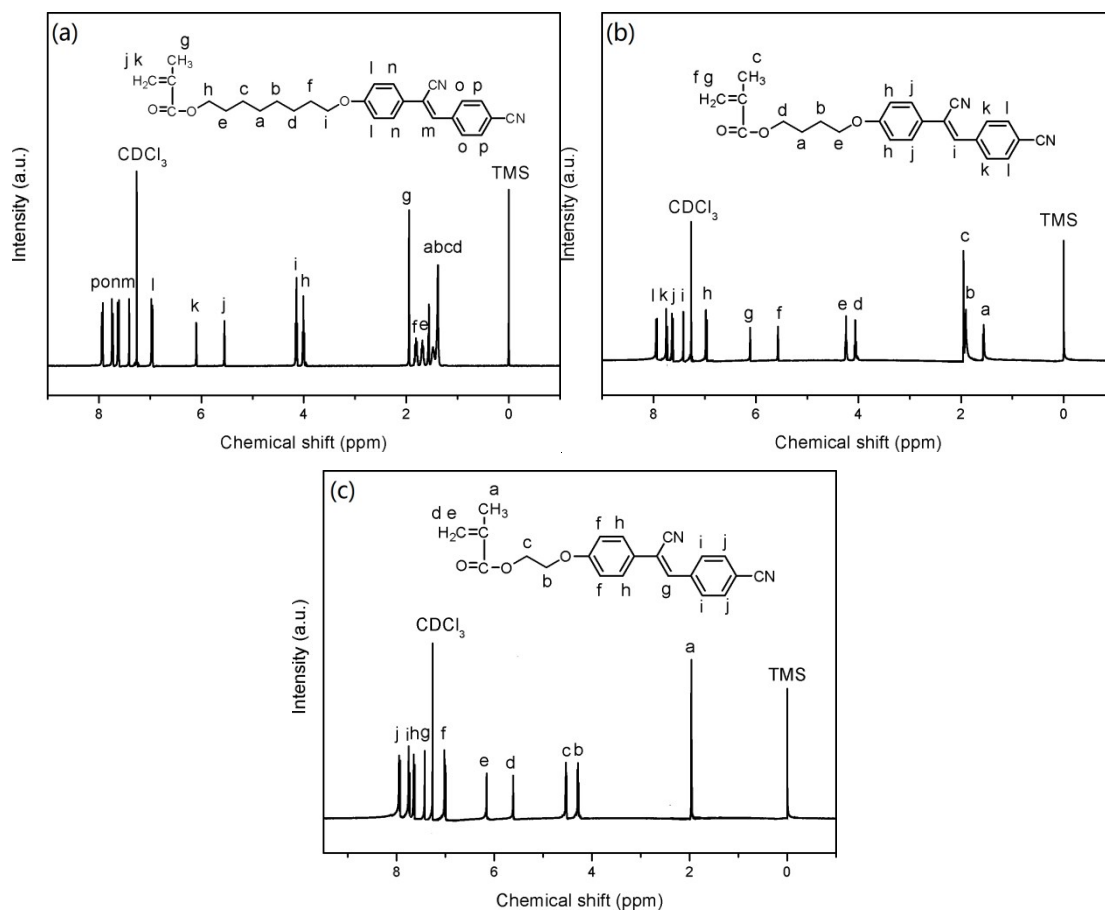

**Fig. S1**  $^1\text{H}$  NMR spectra of M8PVPCN (a), M4PVPCN (b) and M2PVPCN (c) in  $\text{CDCl}_3$ .

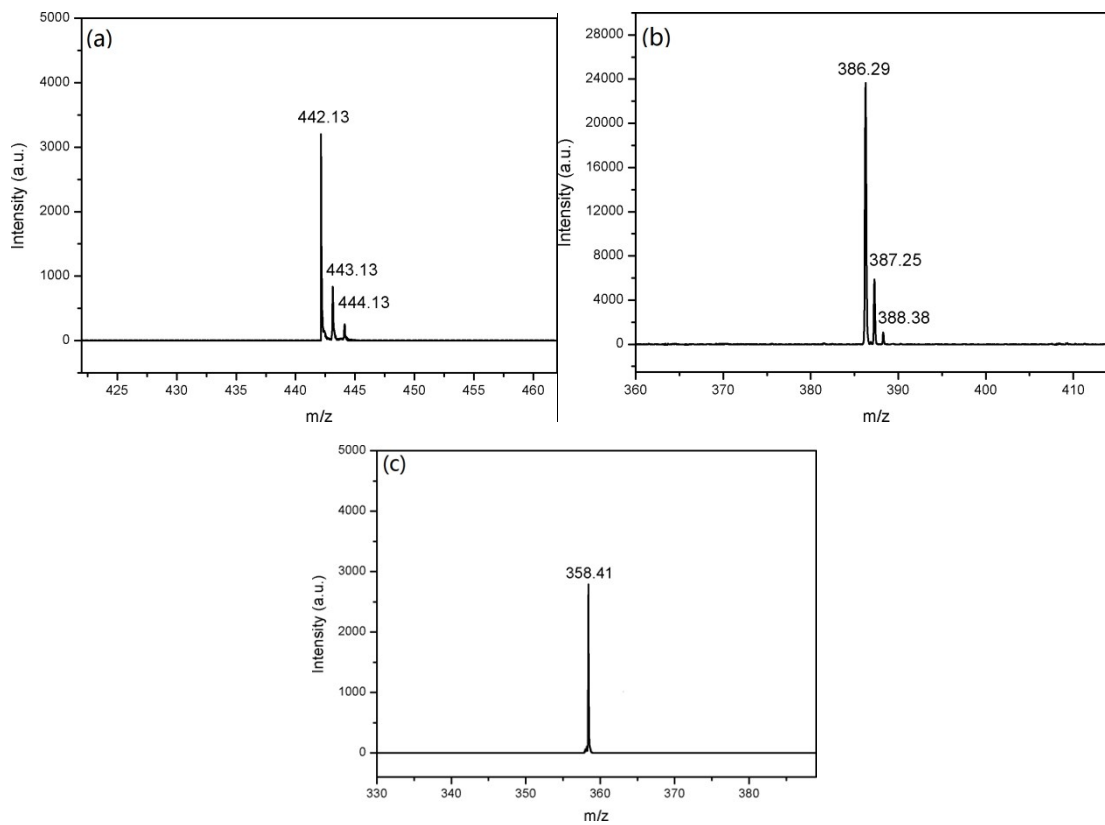

**Fig. S2** Mass spectra of M8PVPCN (a), M4PVPCN (b) and M2PVPCN (c) in  $\text{CDCl}_3$ .

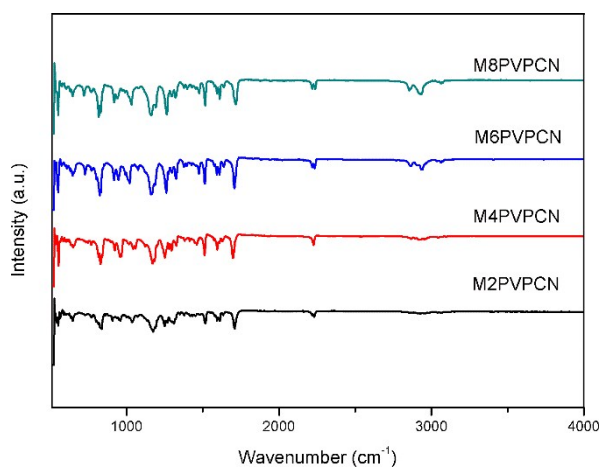

**Fig. S3** FT-IR spectra of monomers MmPVPCN.

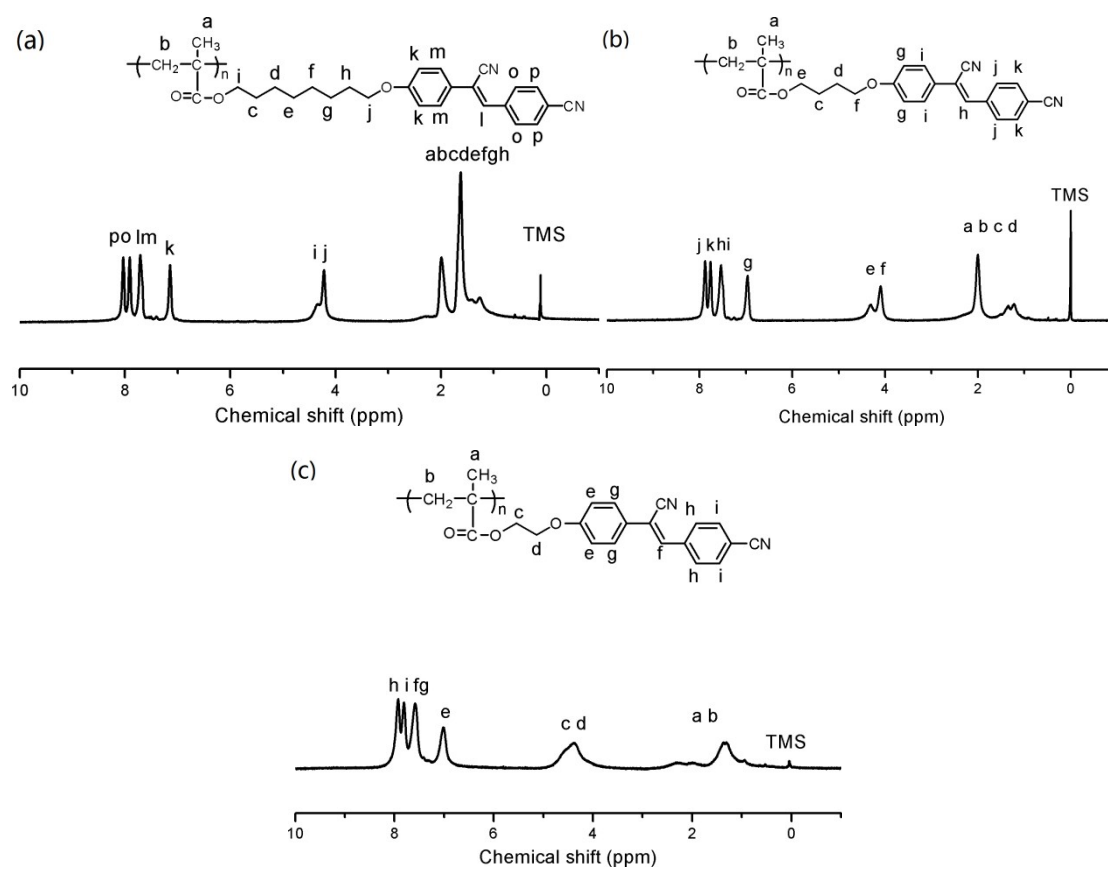

**Fig. S4**  $^1\text{H}$  NMR spectra of PM8PVPCN (a), PM4PVPCN (b) and PM2PVPCN (c) in  $\text{CF}_3\text{COOD}$ .

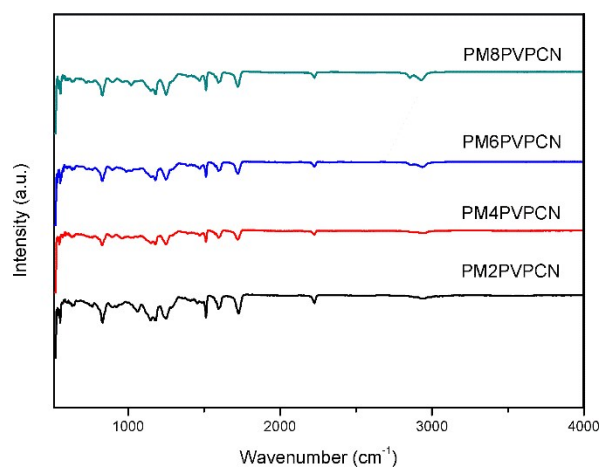

**Fig. S5** FT-IR spectra of polymers PMmPVPCN.

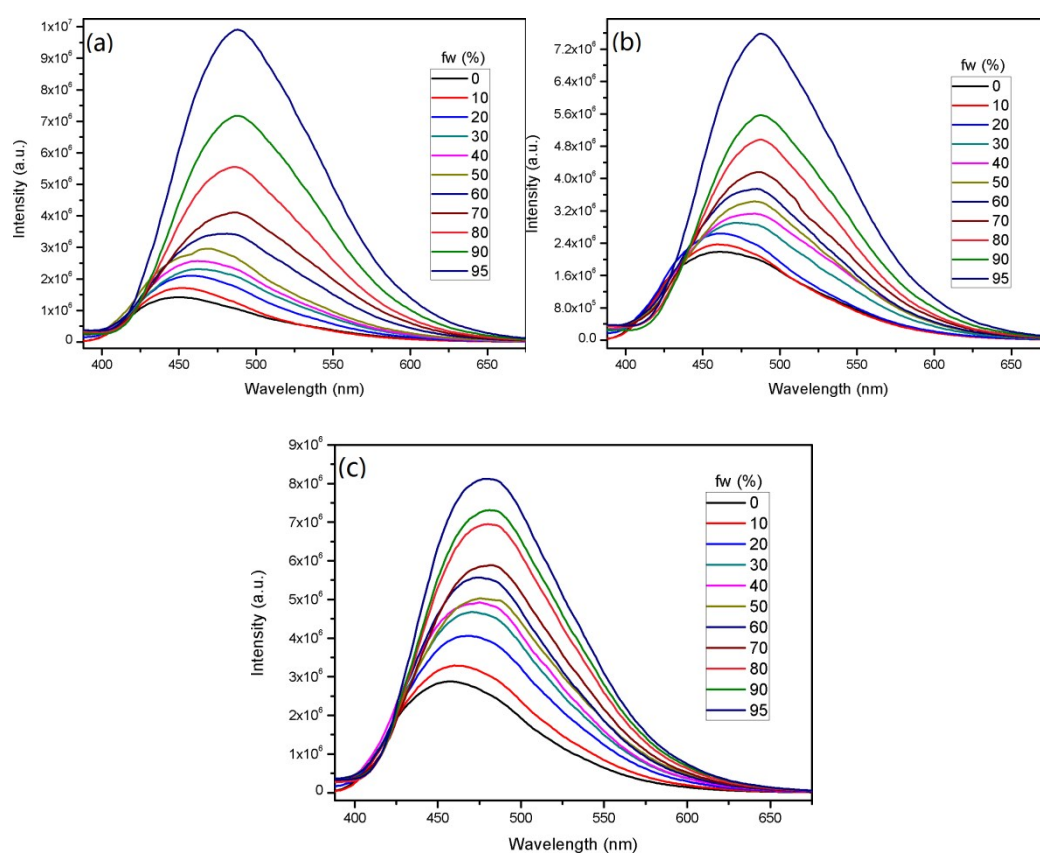

**Fig. S6** Emission spectra of PM8PVPCN (a), PM4PVPCN (b) and PM2PVPCN (c) in THF/H<sub>2</sub>O mixtures.

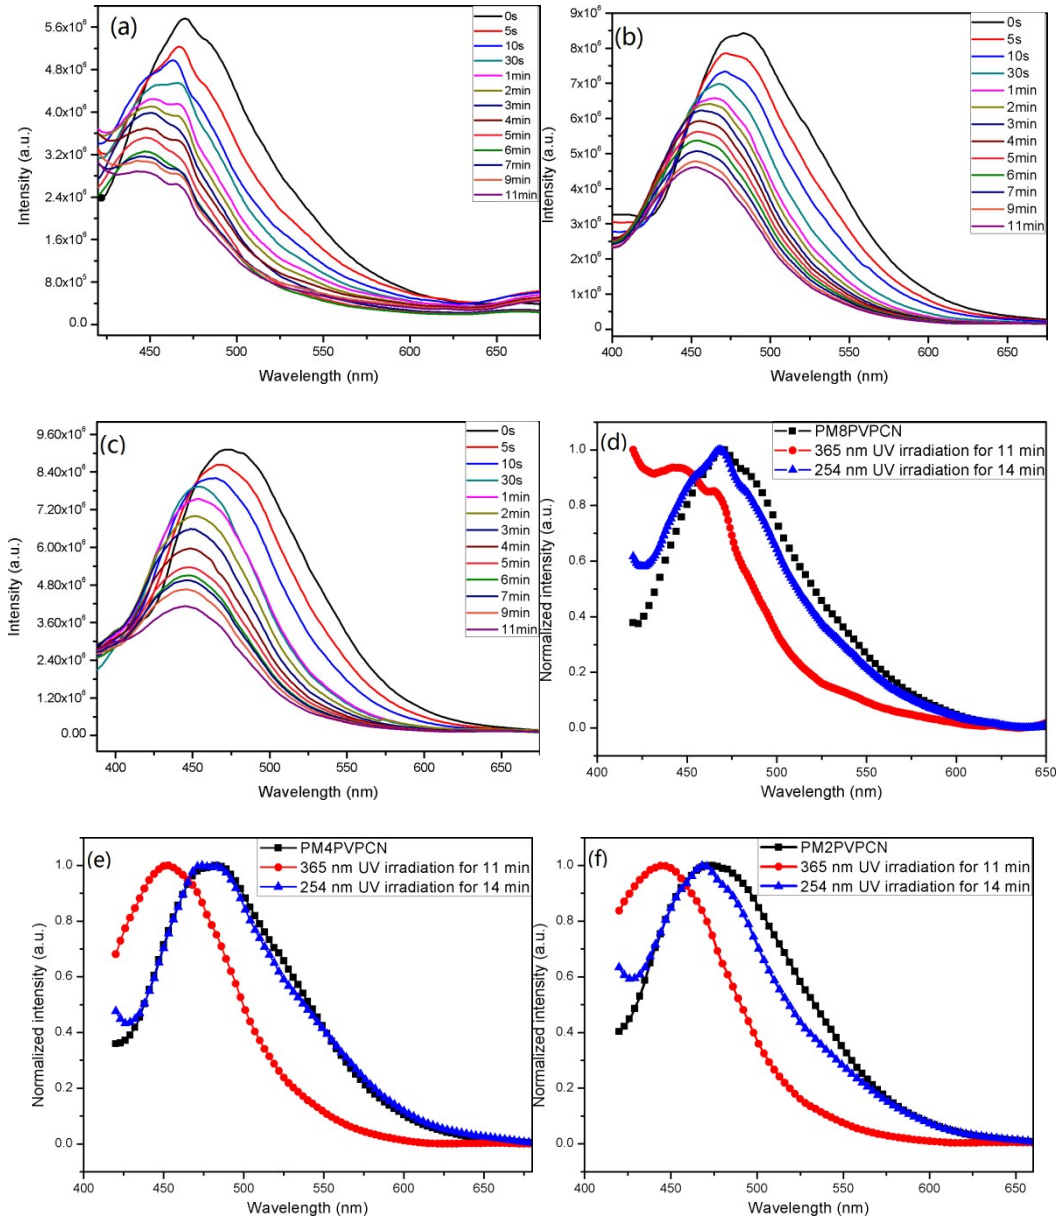

**Fig. S7** Emission spectra of PM8PVPCN film (a), PM4PVPCN film (b) and PM2PVPCN film (c) with different exposure time under 365 nm UV light; Reversible fluorescence photo-responsive properties of PM8PVPCN film (d), PM4PVPCN film (e) and PM2PVPCN film (f). Excitation wavelength= 365 nm.
